# Supplementary material for: A quantitative analysis of 10 multilateral development banks’ investment in conventional and renewable power-generation technologies from 2006 to 2015
Source: Springer Nature journal article supplement (doi:10.1038/s41560-018-0280-3), 2018-11-02
Supplement: 41560_2018_280_MOESM1_ESM.pdf [file 41560_2018_280_MOESM1_ESM.pdf]

In the format provided by the authors and unedited.

# A quantitative analysis of 10 multilateral development banks' investment in conventional and renewable power-generation technologies from 2006 to 2015

Bjarne Steffen \* and Tobias S. Schmidt \*

---

Energy Politics Group, Department of Humanities, Social and Political Sciences, ETH Zurich, Zurich, Switzerland. \*e-mail: [bjarne.steffen@gess.ethz.ch](mailto:bjarne.steffen@gess.ethz.ch); [tobiasschmidt@ethz.ch](mailto:tobiasschmidt@ethz.ch)

# Supplementary Information

## *A quantitative analysis of 10 multilateral development banks' investment in conventional and renewable power generation technologies from 2006 to 2015*

Bjarne Steffen and Tobias S. Schmidt

### Supplementary Note 1: Data availability in OECD DAC databases.

As part of the Organisation for Economic Co-operation and Development (OECD), the international Development Assistance Committee (DAC) collects data on commitments and disbursement of development aid from donors (including MDBs) in two datasets: The DAC5 dataset reports annual amounts by donor and sector (one of which is 'energy'), which are too aggregated to assess MDB's role in power generation. The Creditor Reporting System (CRS) database in principle collects activity level data based on a questionnaire – however, for the period under study (2006–2015) there are major coverage gaps for power generation, as the data provided by MDBs is often not compatible with the CRS level of detail.<sup>1,2</sup> The responsible DAC working party strives at increasing data coverage and consistency, cf. the converged reporting directives from May 2018<sup>3</sup> (see also the discussion in the last paragraph of the main text).

### Supplementary Table 1: Overview previous publications on power-generation finance by multilateral development banks.

| Publications                                           | Years covered | MDBs covered                                                                                         |      |      |     |      |     |      |      | Technologies covered                         |                                        |                                           |                                            |                                               | Details                 |                                  |   |
|--------------------------------------------------------|---------------|------------------------------------------------------------------------------------------------------|------|------|-----|------|-----|------|------|----------------------------------------------|----------------------------------------|-------------------------------------------|--------------------------------------------|-----------------------------------------------|-------------------------|----------------------------------|---|
|                                                        |               | World Bank Group                                                                                     | AfDB | AsDB | CAF | EBRD | EIB | IADB | IsDB | Energy sector or power generation aggregated | Renewables power generation aggregated | Renewables power generation by technology | Non-renewables power generation aggregated | Non-renewables power generation by technology | Split by country/region | Split by branch (public/private) |   |
| <b>From international organizations</b>                |               |                                                                                                      |      |      |     |      |     |      |      |                                              |                                        |                                           |                                            |                                               |                         |                                  |   |
| IRENA (report jointly with CPI) <sup>4</sup>           | 2013–2016     | <i>Sum MDBs, precise scope not given</i>                                                             |      |      |     |      |     |      |      | -                                            | X                                      | -                                         | -                                          | -                                             | -                       | -                                | - |
| MDB joint report on climate finance <sup>5-11</sup>    | 2011–2017     | <i>Sum MDBs, all except CAF/IsDB</i>                                                                 |      |      |     |      |     |      |      | -                                            | X                                      | -                                         | -                                          | -                                             | (X) <sup>a</sup>        | -                                |   |
| OECD DAC report/databases <sup>12</sup>                | 2005–2016     | <i>Report: Sum MDBs for energy sector aggregated. CRS database: project-level data [incomplete].</i> |      |      |     |      |     |      |      |                                              |                                        |                                           |                                            |                                               |                         |                                  |   |
| <b>From non-governmental organizations</b>             |               |                                                                                                      |      |      |     |      |     |      |      |                                              |                                        |                                           |                                            |                                               |                         |                                  |   |
| Center for Strategic & Internat. Studies <sup>13</sup> | 2016          | X                                                                                                    | X    | X    | -   | -    | -   | -    | -    | X                                            | X                                      | -                                         | X                                          | -                                             | -                       | -                                |   |
| E3G Think Tank <sup>1,14</sup>                         | 2013–2016     | X                                                                                                    | X    | X    | -   | X    | X   | X    | -    | X                                            | (X) <sup>b</sup>                       | -                                         | -                                          | -                                             | -                       | -                                |   |
| National Resources Defense Council <sup>15</sup>       | 2013–2016     | X                                                                                                    | X    | X    | -   | X    | X   | X    | -    | -                                            | X                                      | -                                         | -                                          | -                                             | X                       | -                                |   |
| Oil Change International <sup>16,17</sup>              | 2008–2016     | X                                                                                                    | X    | X    | -   | X    | X   | X    | -    | X                                            | (X) <sup>c</sup>                       | -                                         | -                                          | -                                             | -                       | -                                |   |
| World Resources Institute <sup>18</sup>                | 2015–2016     | X                                                                                                    | -    | X    | -   | -    | -   | -    | -    | X                                            | X                                      | X                                         | X                                          | X                                             | -                       | -                                |   |
| <b>Scholarly articles</b>                              |               |                                                                                                      |      |      |     |      |     |      |      |                                              |                                        |                                           |                                            |                                               |                         |                                  |   |
| Delina 2011 <sup>19</sup>                              | 2000–2009     | -                                                                                                    | -    | X    | -   | -    | -   | -    | -    | X                                            | X                                      | -                                         | X                                          | -                                             | (X) <sup>d</sup>        | (X) <sup>d</sup>                 |   |
| Martinot 2001 <sup>20</sup>                            | 1992–1999     | X                                                                                                    | -    | -    | -   | -    | -   | -    | -    | -                                            | X                                      | X                                         | -                                          | -                                             | X                       | X                                |   |
| Tirpak & Adams 2008 <sup>21</sup>                      | 1997–2005     | X                                                                                                    | -    | X    | -   | X    | -   | X    | -    | X                                            | X                                      | -                                         | -                                          | -                                             | -                       | -                                |   |
| This article                                           | 2006–2015     | X                                                                                                    | X    | X    | X   | X    | X   | X    | X    | X                                            | X                                      | X                                         | X                                          | X                                             | X                       | X                                |   |

Notes:

<sup>a</sup> Regional split of finance for renewable energy since 2015

<sup>b</sup> Differentiates between “energy-related climate finance” (mainly renewables), “fossil finance” (incl. power generation, but also oil & gas upstream, etc.)

<sup>c</sup> Differentiates between “clean” (mainly renewables), “fossil fuel finance” (incl. power generation, but also oil & gas upstream etc.), “other”

<sup>d</sup> Split by country and by branch (public/private) only for energy sector aggregated

**Supplementary Table 2: Financial commitments to power-generation projects by multilateral development banks (2006–2015).**

| Acronym      | Full Name                                        | Commitments 2006–2015 (USD <sub>2015</sub> billion) |             |                       |                      | Total       |
|--------------|--------------------------------------------------|-----------------------------------------------------|-------------|-----------------------|----------------------|-------------|
|              |                                                  | Non-renewable                                       | Hydro       | Renewable excl. hydro | Mixed or unspecified |             |
| AfDB         | African Development Bank                         | 4.8                                                 | 0.6         | 1.4                   | 0.1                  | <b>6.8</b>  |
| AsDB         | Asian Development Bank                           | 5.8                                                 | 3.8         | 3.5                   | -                    | <b>13.1</b> |
| CAF          | Development Bank of Latin America                | 1.5                                                 | 2.1         | 0.5                   | 1.5                  | <b>5.6</b>  |
| EBRD         | European Bank for Reconstruction and Development | 3.5                                                 | 1.2         | 3.6                   | 0.9                  | <b>9.1</b>  |
| EIB          | European Investment Bank                         | 3.9                                                 | 2.3         | 7.5                   | 1.6                  | <b>15.4</b> |
| IADB         | Inter-American Development Bank                  | 0.6                                                 | 3.1         | 1.3                   | -                    | <b>5.0</b>  |
| IFC          | International Finance Corporation                | 3.3                                                 | 2.5         | 3.8                   | 0.9                  | <b>10.4</b> |
| IsDB         | Islamic Development Bank                         | 4.2                                                 | 1.2         | 1.0                   | 0.1                  | <b>6.5</b>  |
| WB           | World Bank (includes IBRD and IDA)               | 7.4                                                 | 6.1         | 7.0                   | 0.2                  | <b>20.7</b> |
| <b>Total</b> |                                                  | <b>34.9</b>                                         | <b>23.0</b> | <b>29.6</b>           | <b>5.2</b>           | <b>92.7</b> |

Note: Commitments include all types of financial instruments except for guarantees. Numbers partly do not add up due to rounding

**Supplementary Table 3: Overview of participants in the expert interviews.**

| Interviewee no. | Job title/role                    |
|-----------------|-----------------------------------|
| 1               | Energy Specialist                 |
| 2               | Head of Renewable Energy Division |
| 3               | Investment Officer                |
| 4               | Investment Officer                |
| 5               | Lead Energy Specialist            |
| 6               | Manager, Energy Division          |
| 7               | Press Officer (energy sector)     |
| 8               | Principal Energy Officer          |
| 9               | Private Sector Specialist         |
| 10              | Regional Director                 |
| 11              | Sector Manager                    |
| 12              | Senior Energy Specialist          |

Note: The interviewees represent six different MDBs (see Methods).

**Supplementary Figure 1: Comparison between brownfield and greenfield power-generation projects financed by multilateral development banks.** The height of each row and the numbers at the right denote the commitments of MDBs by technology. The shades and the percentages represent the greenfield and brownfield projects. Commitments include all types of financial instruments, except for guarantees. The large proportion of renewable projects that are ‘mixed/unspecified’ is explained by the prevalence of portfolio/framework commitments in which the exact location of the project (hence, whether it is greenfield or brownfield) is not yet determined.

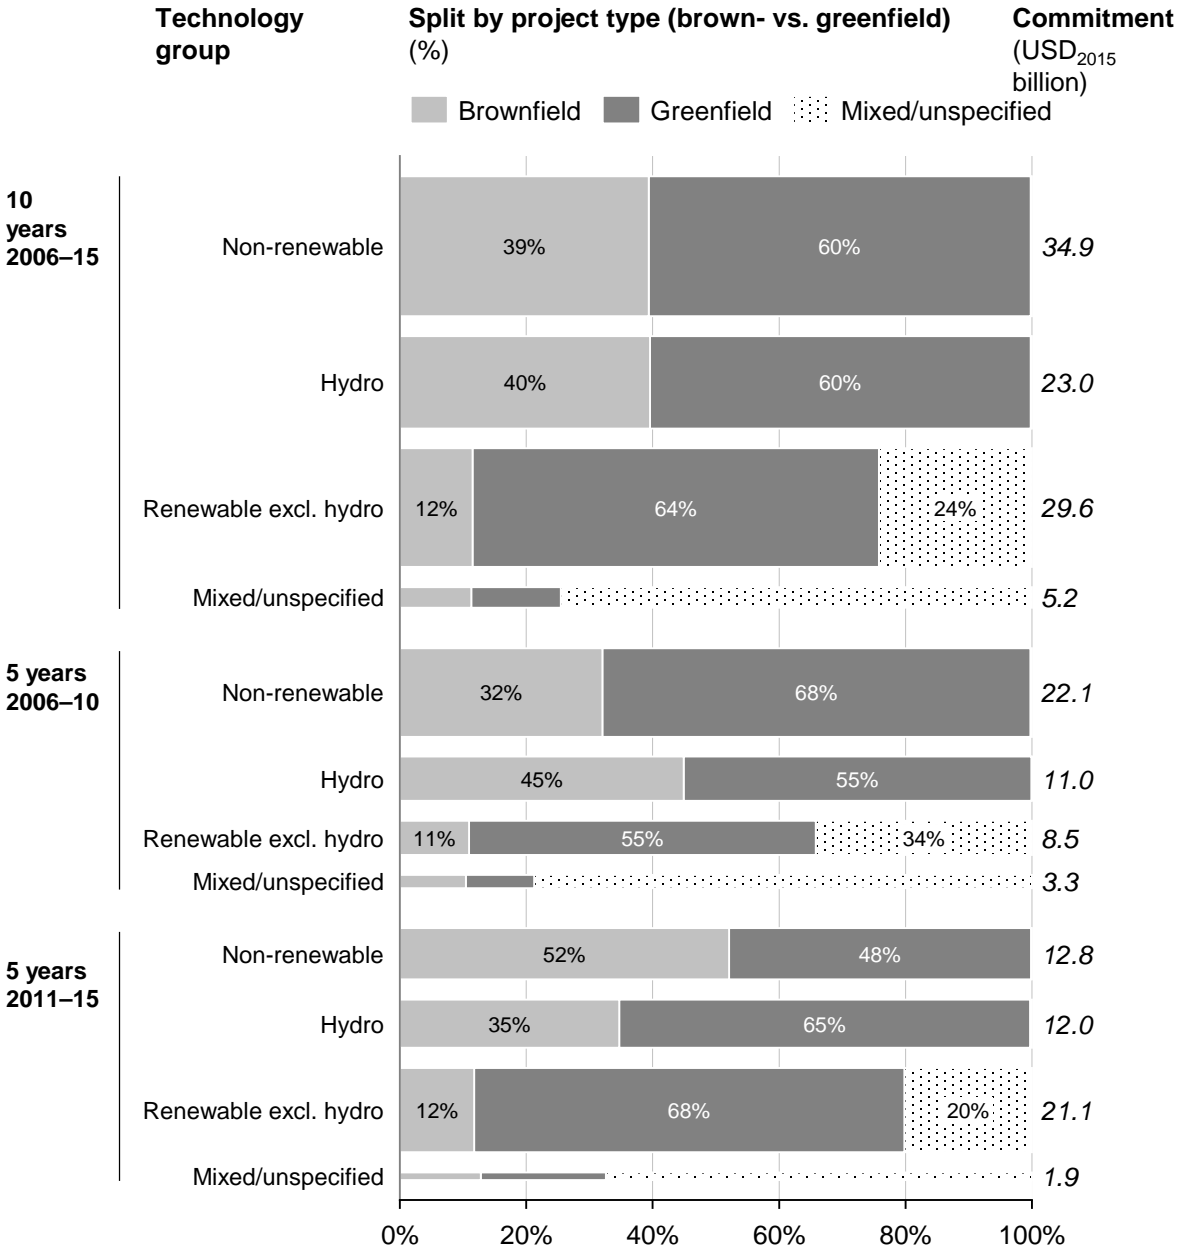

**Supplementary Figure 2: Comparison between financial instruments in power-generation financing by MBDs.** The height of each row and the numbers at the right denote the commitments of MBDs by technology. The shades represent the different financial instruments. Commitments include all types of financial instruments, except for guarantees.

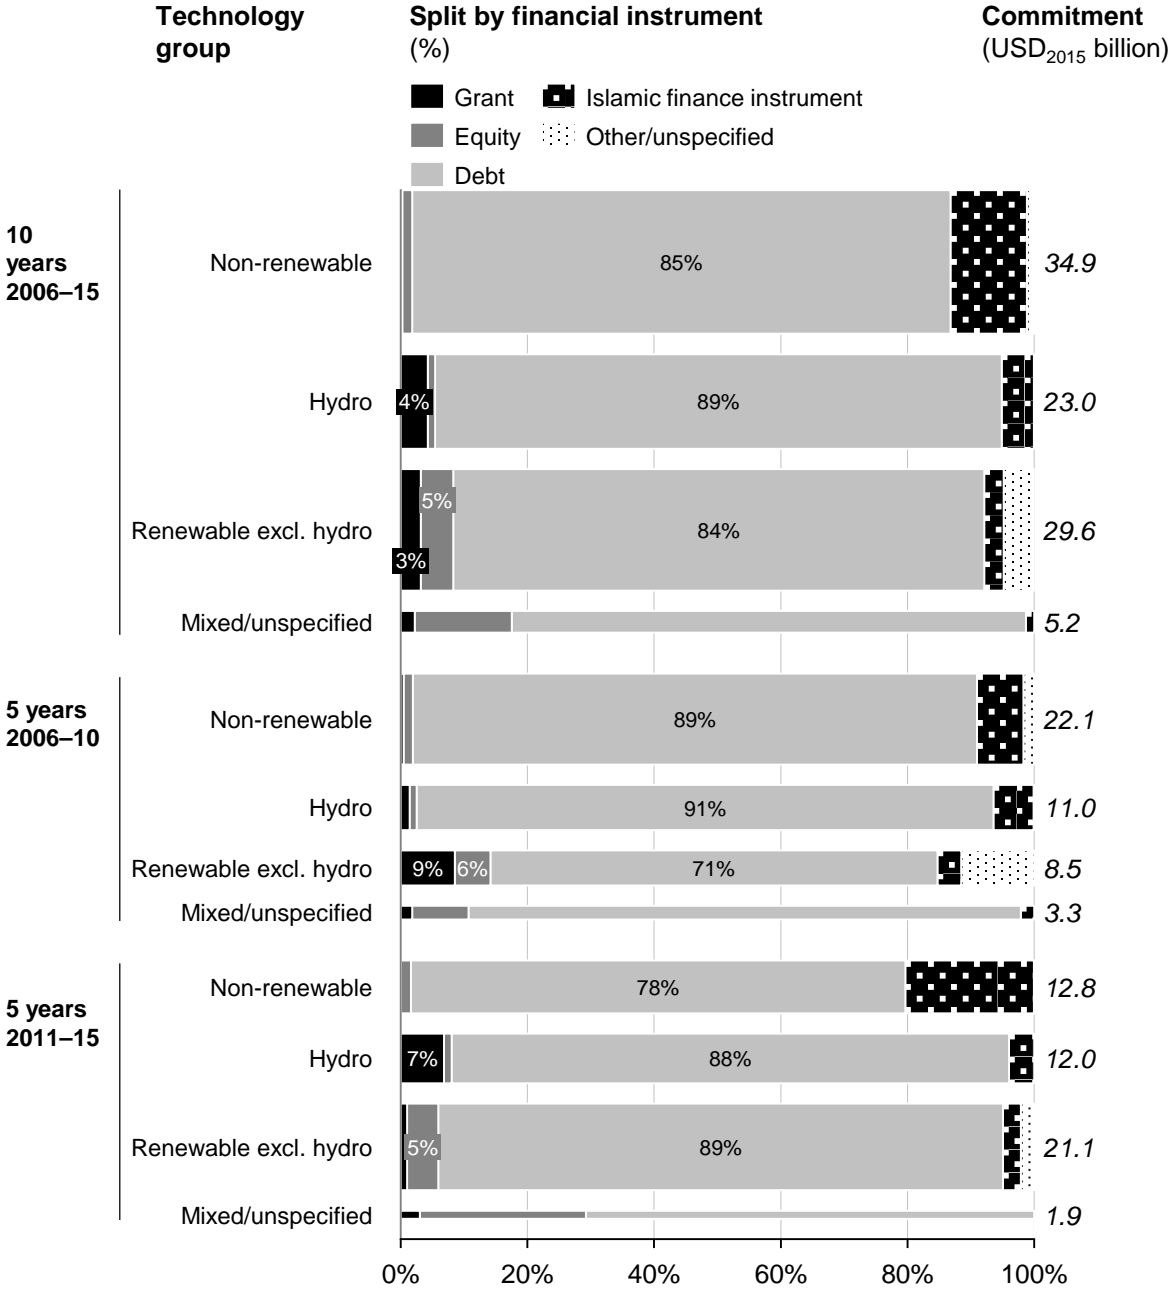

**Supplementary Figure 3: Financial commitments to power-generation technologies by branches of the World Bank group over two five-year periods.** The width of each column and the numbers at the top of each graph denote the commitments of MDBs by sector, which are differentiated between public and private borrowers for the WB (the IFC and the MIGA only deal with private borrowers). The shades and the percentages represent the different technologies. For the WB and the IFC, commitments include all types of financial instruments, except for guarantees. For the MIGA, all commitments are guarantees. Note: Excludes projects that do not clearly belong to one sector (mainly public–private partnerships).

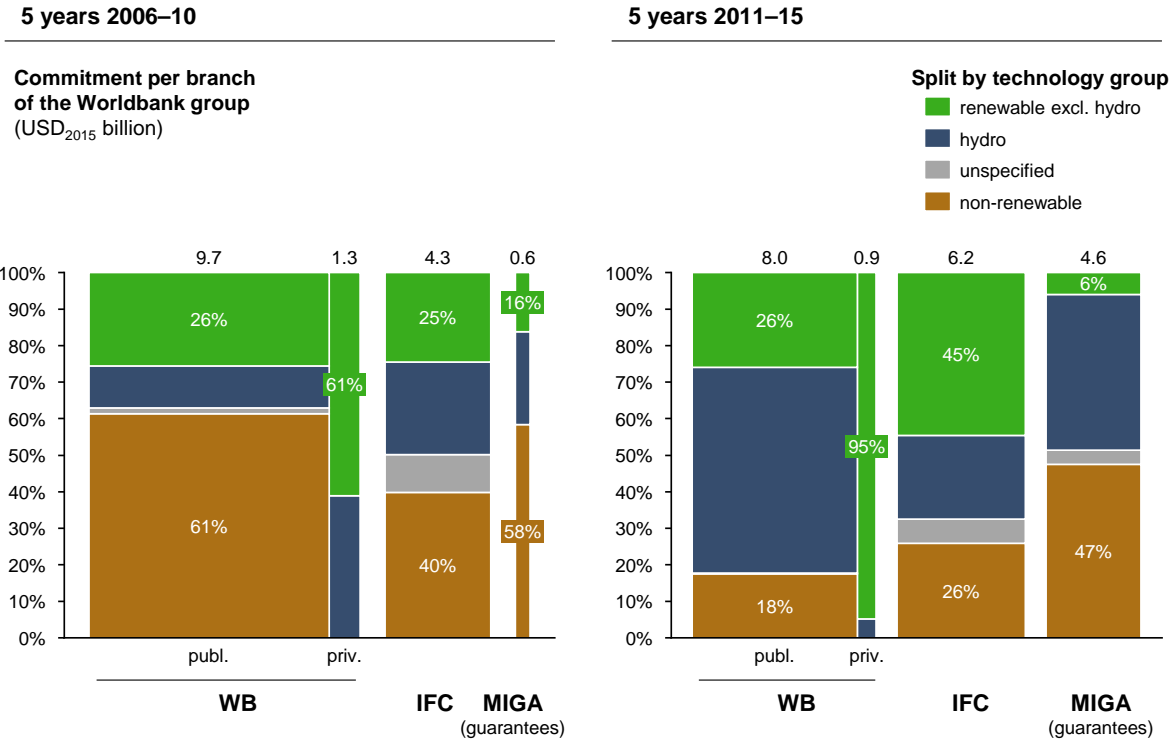

**Supplementary Figure 4: Financial commitments to power-generation technologies by branches of regional MDBs over two five-year periods.** The width of each column and the numbers at the top of each graph denote the commitments of MDBs by sector (public vs private borrowers). The shades and the percentages represent the different technologies. Commitments include all types of financial instruments, except for guarantees. Note: Excludes projects that do not clearly belong to one sector (mainly public–private partnerships).

**5 years 2006–10**

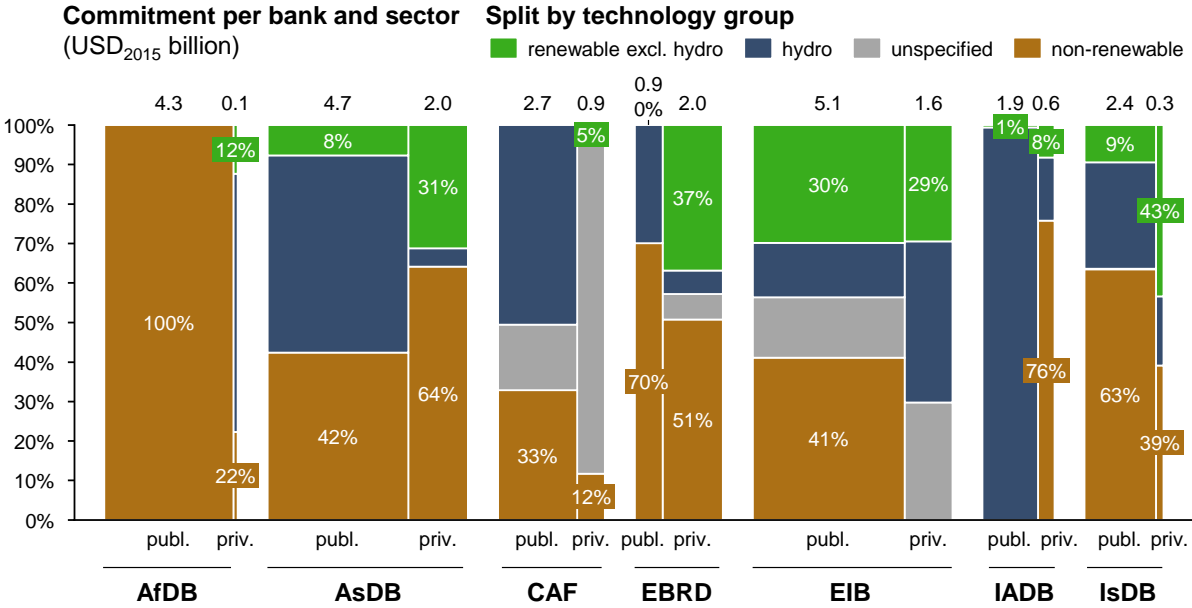

**5 years 2011–15**

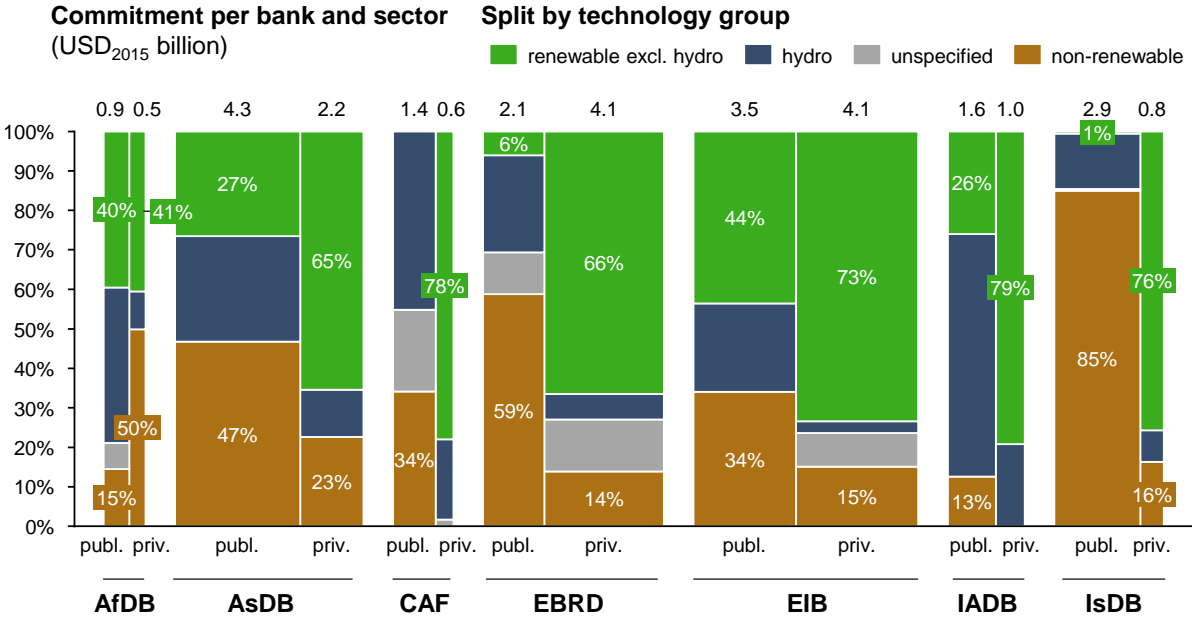

## Supplementary References

1. Wright, H., Hawkins, J., Orozco, D. & Mabey, N. *Banking on Reform: Aligning Development Banks With the Paris Climate Agreement*. (2018).
2. OECD DAC. Frequently Asked Questions - 4.3 What is the difference between the DAC and CRS datasets? (2018). Available at: <http://www.oecd.org/dac/financing-sustainable-development/development-finance-data/faq.htm>.
3. OECD DAC. *Converged Statistical Reporting Directives for the Creditor Reporting System (CRS) and the Annual DAC Questionnaire*. DCD/DAC/STAT(2018)9/FINAL. (2018).
4. IRENA and CPI. *Global Landscape of Renewable Energy Finance 2018*. (2018).
5. Group of Multilateral Development Banks. *Joint MDB Report on Mitigation Finance 2011*. (2012).
6. Group of Multilateral Development Banks. *Joint Report on MDB Climate Finance 2012*. (2013).
7. Group of Multilateral Development Banks. *Joint Report on MDB Climate Finance 2013*. (2014).
8. Group of Multilateral Development Banks. *2014 Joint Report on Multilateral Development Banks' Climate Finance*. (2015).
9. Group of Multilateral Development Banks. *2015 Joint Report on Multilateral Development Banks' Climate Finance*. (2016).
10. Group of Multilateral Development Banks. *2016 Joint Report on Multilateral Development Banks' Climate Finance*. (2017).
11. Group of Multilateral Development Banks. *2017 Joint Report on Multilateral Development Banks' Climate Finance*. (2018).
12. Miyamoto, K. & Chiofalo, E. *Official Development Finance for Infrastructure : With a*



- Special Focus on Multilateral Development Banks.* (2016).
13. Barnett, J. & Ladislaw, S. *Frameworks for Energy Investment in Development Organizations.* (2018).
  14. Wright, H., Holmes, I., Barbe, R. & Hawkins, J. *Greening Financial Flows - What Progress Has Been Made in the Development Banks ?* (2017).
  15. Chen, H. & Schmidt, J. *Power Shift: Shifting G20 International Public Finance from Coal to Renewables.* **R: 17-10-B**, (2017).
  16. Oil Change International. *Fossil fuel finance at the Multilateral Development Banks: The low-hanging fruit of Paris compliance.* (2017).
  17. Oil Change International. *Cross Purposes: Multilateral Development Banks Still Funding Billions in Fossil Fuels.* (2017).
  18. Christianson, G., Lee, A., Larsen, G. & Green, A. *Financing the Energy Transition: Are World Bank, IFC, and ADB Energy Supply Investments Supporting a Low-Carbon Future ?* (2017).
  19. Delina, L. L. Asian Development Bank's support for clean energy. *Clim. Policy* **11**, 1350–1366 (2011).
  20. Martinot, E. Renewable energy investment by the World Bank. *Energy Policy* **29**, 689–699 (2001).
  21. Tirpak, D. & Adams, H. Bilateral and multilateral financial assistance for the energy sector of developing countries. *Clim. Policy* **8**, 135–151 (2008).
